# Supplementary material
Source: Research Square preprint supplement (doi:10.21203/rs.3.rs-9695712/v1)
Supplement: Supplementary file 1 [file df938f224d2ebd35fb7aec0c.pdf]

## Supplementary Information

### Structural and compositional analysis of palm leaf manuscripts using synchrotron X-ray methods: a statistical analysis

Laura Gallardo, Mark Busch, Giovanni Ciotti, Patrick Huber

#### S1. Sample parameters in BM02 and P62

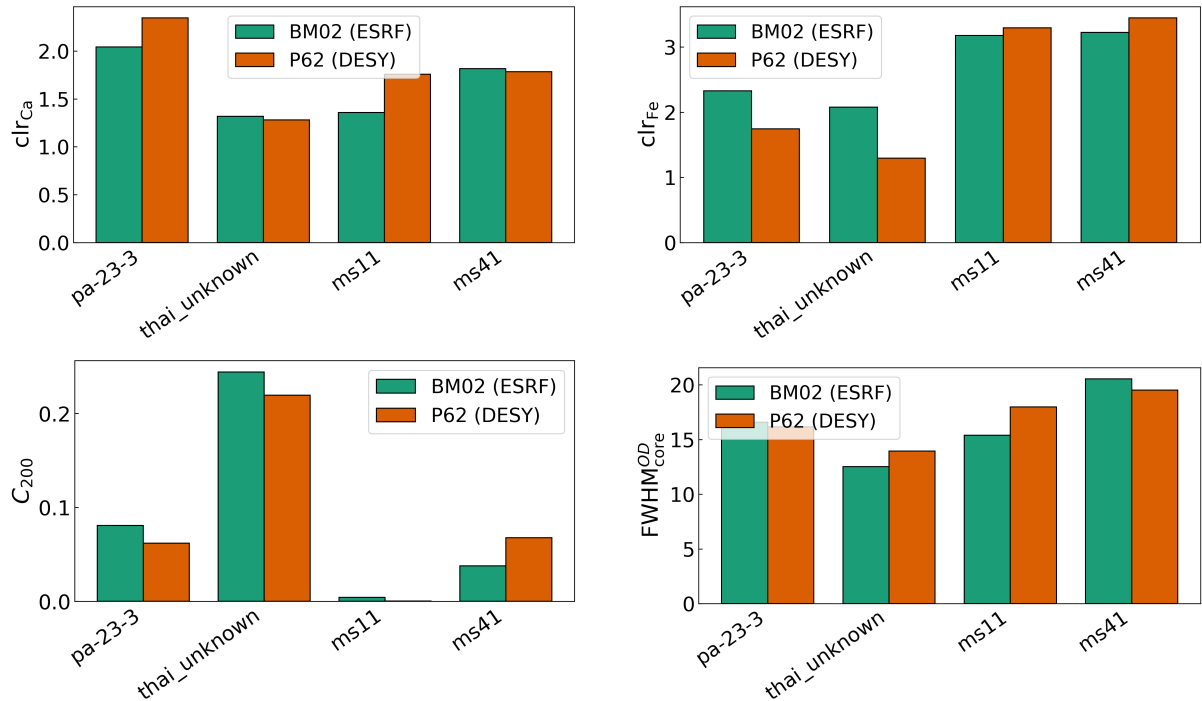

Figure 1: **Selected features as calculated from measurements at different beam lines.** In order: Centered log-ratios of calcium  $clr_{Ca}$ , and iron  $clr_{Fe}$ , crystallinity index of cellulose [200] crystallographic plane  $C_{200}$ , and full width at half-maximum of the core component in the orthogonal direction (OD) of the leaf (short side). Measurements were performed on the same samples but scan region may vary. Selected samples were chosen to represent different groups: pa-23-3 is unprocessed, *Corypha*, Thai; thai\_unknown is Thai writing support; ms11 is an Indian manuscript fragment, *Borassus*; and ms41 is an Indian manuscript fragment, *Corypha*. Plots show similar values for both measurements, where differences are attributed to the evaluation of the different scan regions selected.

## S2. Sample parameters upon sample rotation

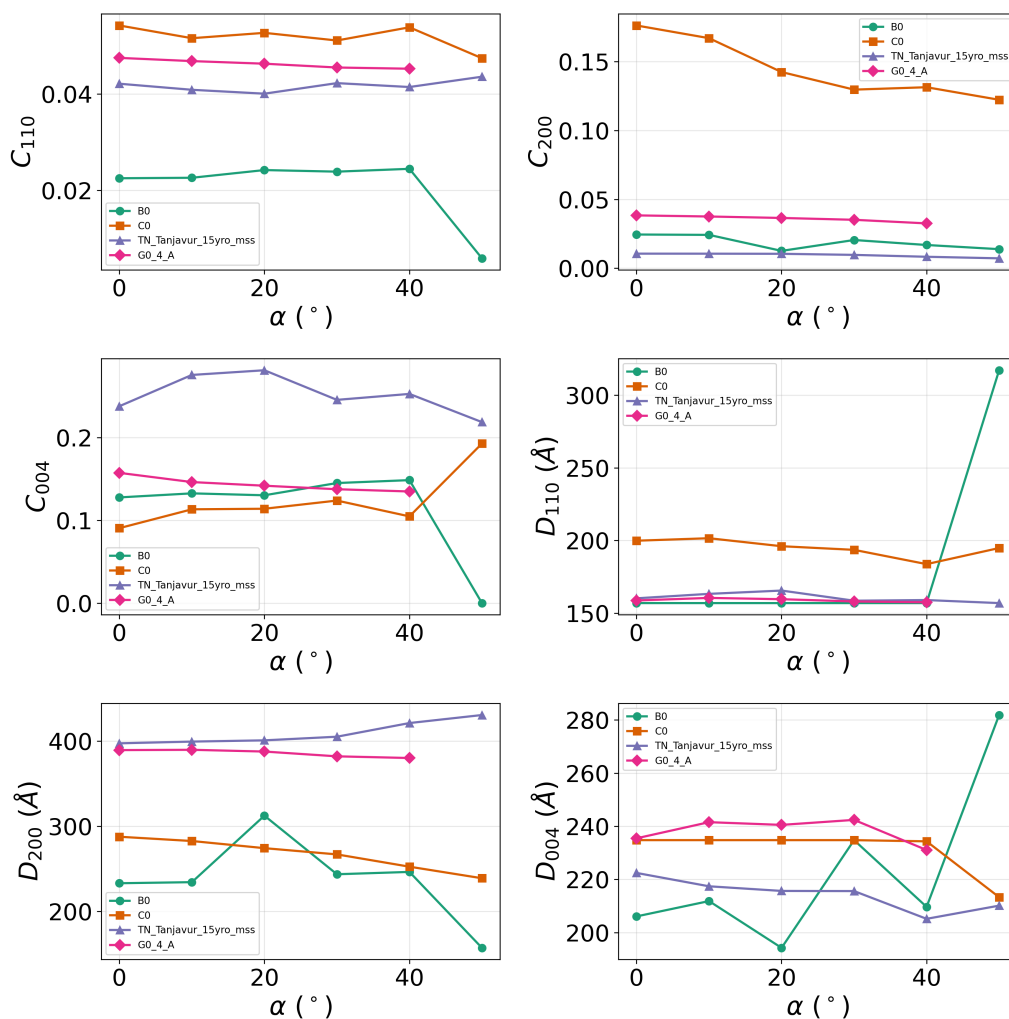

Figure 2: **Crystallinity ( $C$ ) and crystal sizes ( $D$ ) dependence on sample-beam rotation  $\alpha$ , for different cellulose crystallographic planes  $[hkl]$ .** Rotation measurements were performed on four different samples: B0 and C0 are unprocessed *Borassus* and *Corypha* leaves, TN\_Tanjavur\_15yro\_mss is a manuscript fragment from Tanjavur (Tamil Nadu, India), genus *Corypha*, and G0\_4\_A is a reference writing support sample from Bali, Indonesia, genus *Borassus*. The plots show that features tend to be constant, but deviations are more likely as sample rotation increases, especially over  $40^\circ$ . Exception is sample B0, which shows deviations already at  $30^\circ$ , this could be due to natural bending of the samples, which are sometimes difficult to adjust flat on the sample holder. For the statistics, we keep the measurements performed with  $\alpha$  as close to  $0^\circ$  as possible.
